# Supplementary material for: Synthesis of nanoparticle-assembled tin oxide/polymer microcapsules
Source: Royal Society of Chemistry journal article supplement (doi:10.1039/b513901e), 2006-01-01
Supplement: b513901e.pdf [file b513901e.pdf]

Electronic Supplementary Information

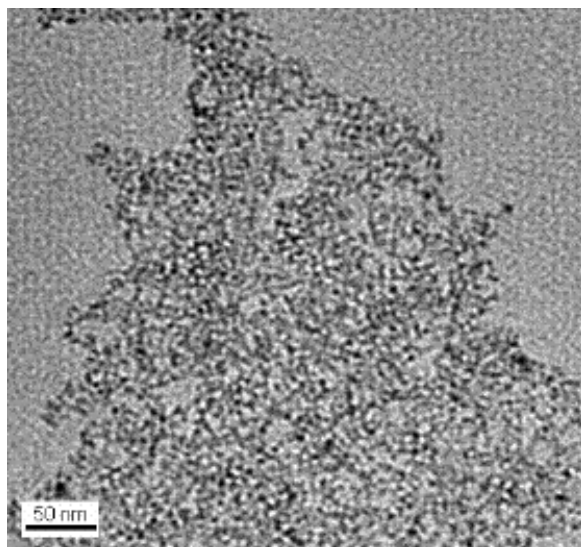

5

**Fig. S1** TEM image of SnO<sub>2</sub> NPs (aggregated during TEM sample preparation). Scale bar: 50 nm

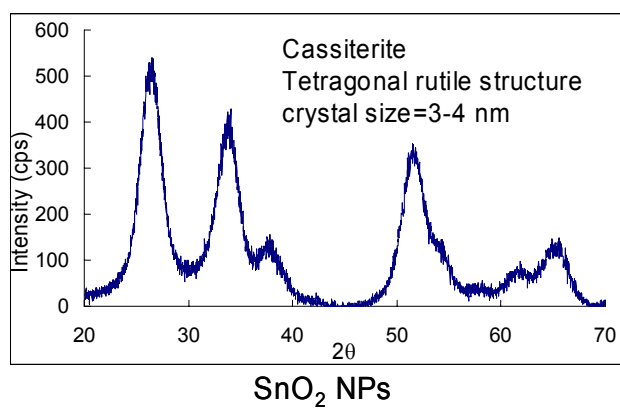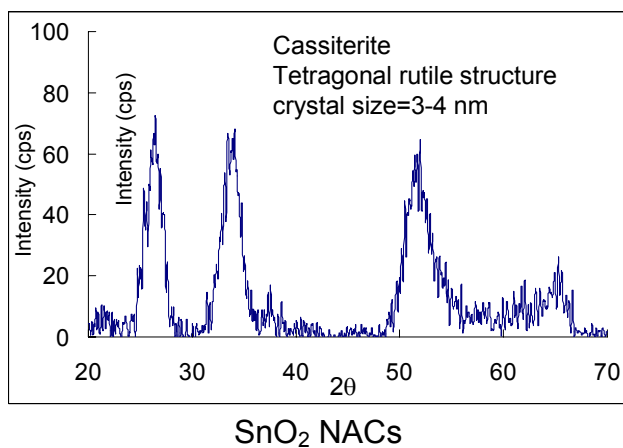

**Fig. S2** XRD patterns of SnO<sub>2</sub> NPs and resultant SnO<sub>2</sub> microcapsules. Suspensions were dried prior to XRD measurement. Data were obtained with a powder diffractometer (Rigaku D/Max-2100PC) using unfiltered Cu-Kα radiation (λ = 1.5406 Å) at 40 kV and 40 mA.
